# Supplementary material for: Targeted-Deletion of a Tiny Sequence via Prime Editing to Restore SMN Expression
Source: MDPI journal article supplement (doi:10.3390/ijms23147941), 2022-07-19
Supplement: s1 [file s1]

## Supplementary Material

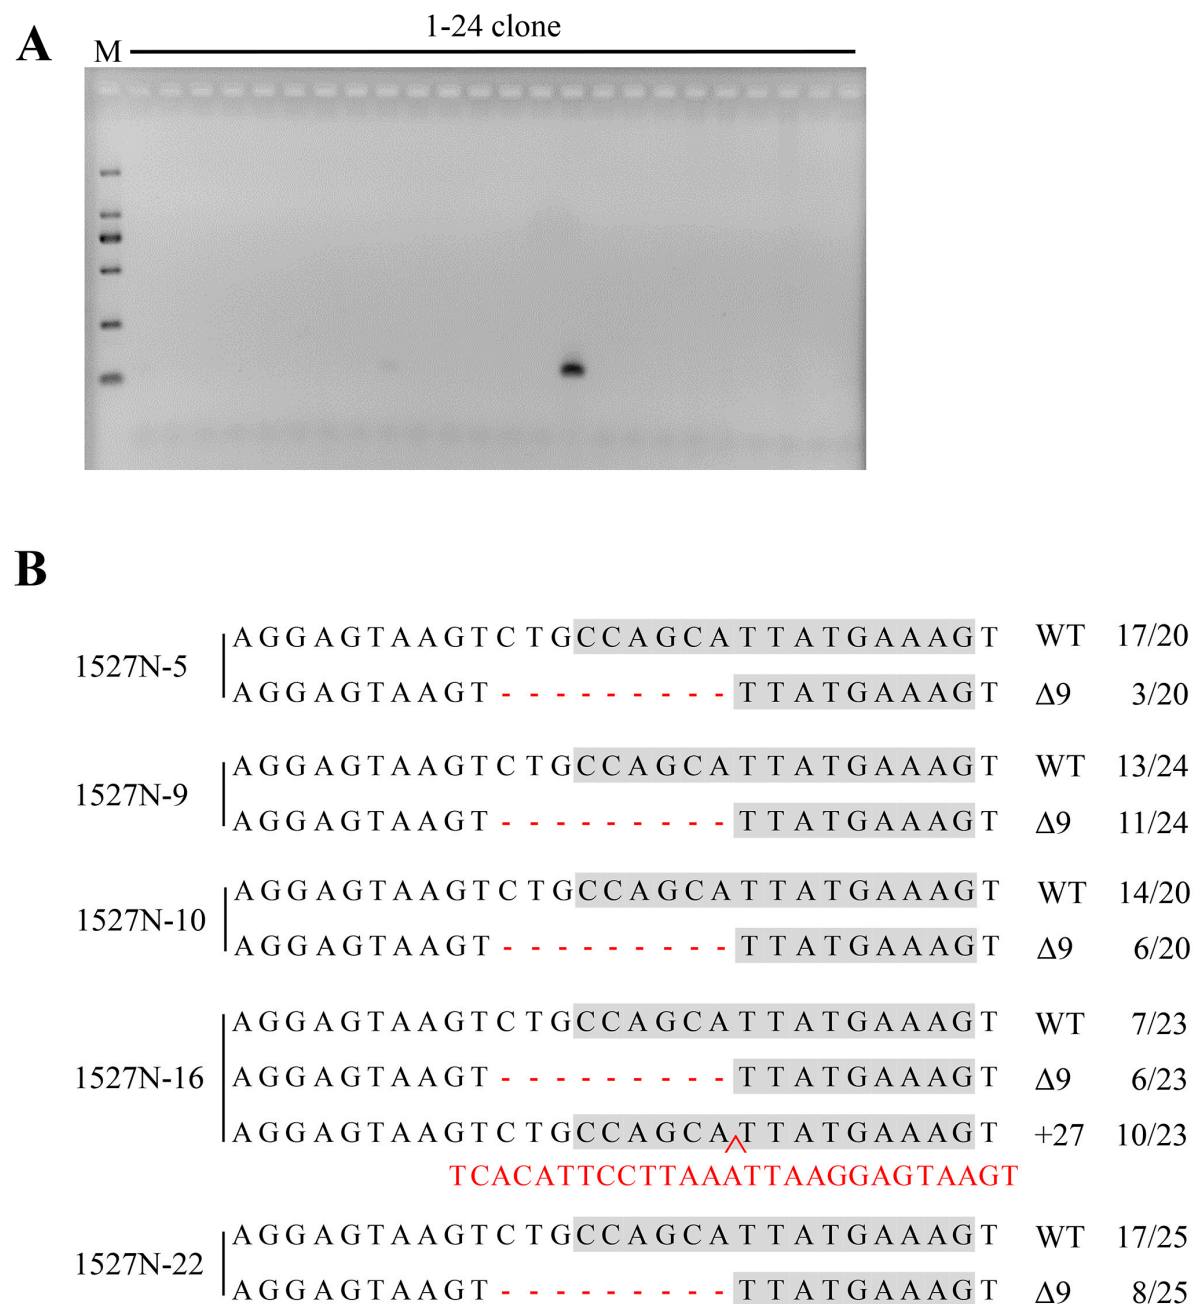

**Figure S1.** Targeted-deletion and screening. (A) Twenty-four candidate mono-clones of 1327N were picked, followed by genomic DNA extraction and PCR analysis using specific primer. The targeted-deletion obtained a 121 bp band. M, DL2000 DNA ladder. (B) T-A cloning and sequencing of the positive clones of 1527N. The deletions are indicated by a red dashed line. The insertions are indicated by red characters. The column on the right indicates the percent of the relevant genotype in total sequencing reads. WT, wild-type. Δ, deletion. "+", insertion.

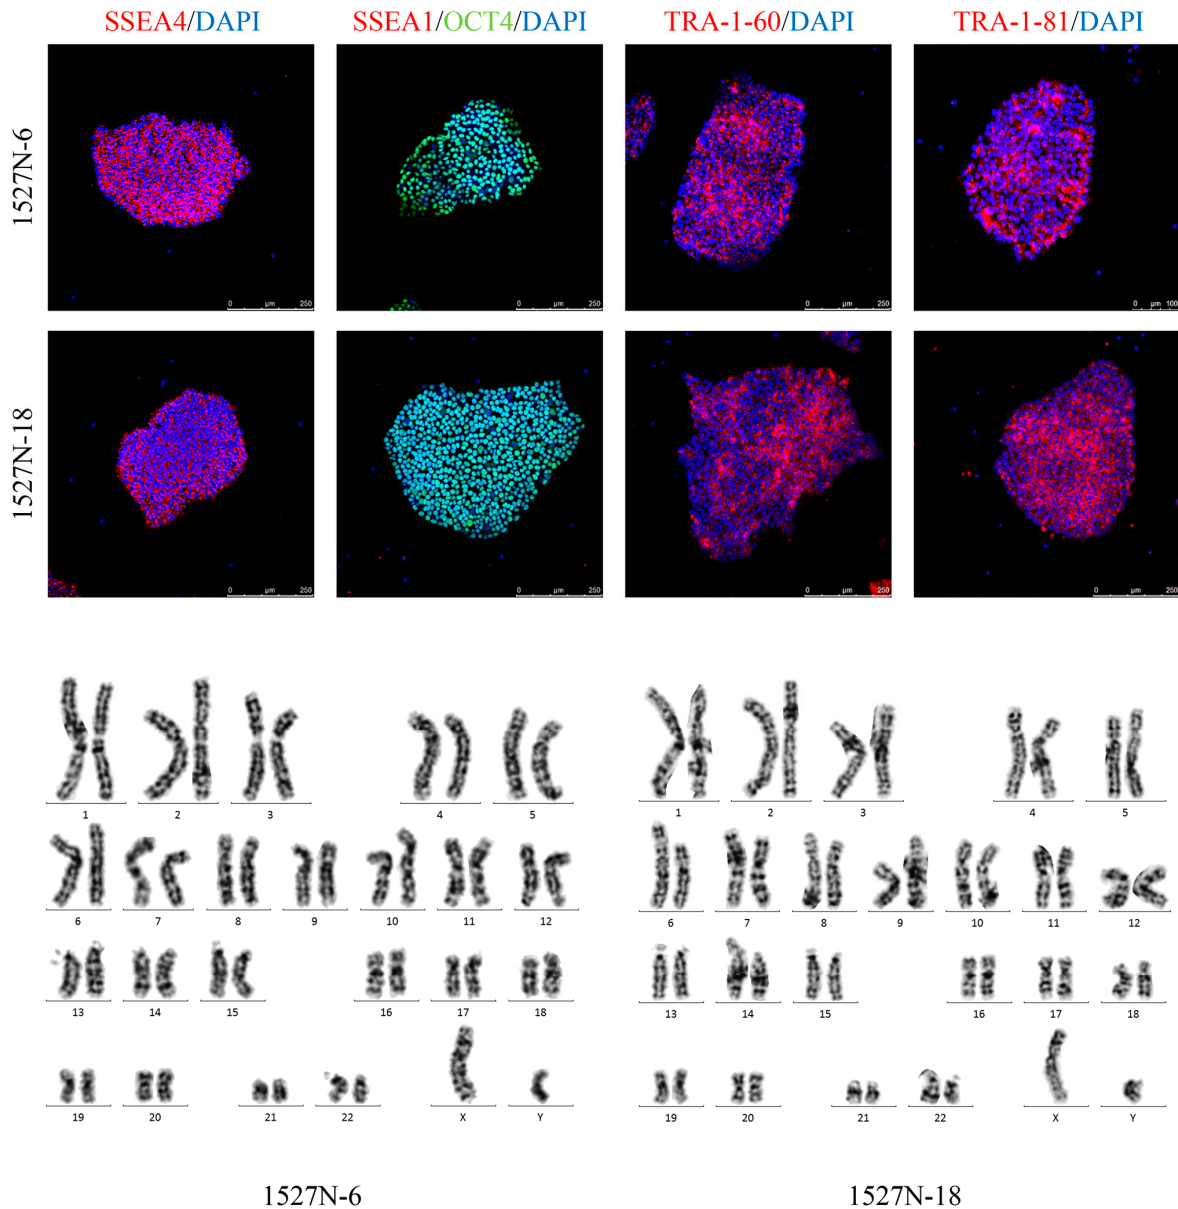

**Figure S2.** Characterization of the targeted-deletion iPSCs clones. Expression of pluripotency markers in targeted-deletion 1527N-6 and 1527N-18 cell line were detected by immunocytochemistry and karyotype. DAPI indicate the total cell present in the image. The targeted-deletion iPS cell lines are maintain the pluripotency of stem cell and the normal karyotype.

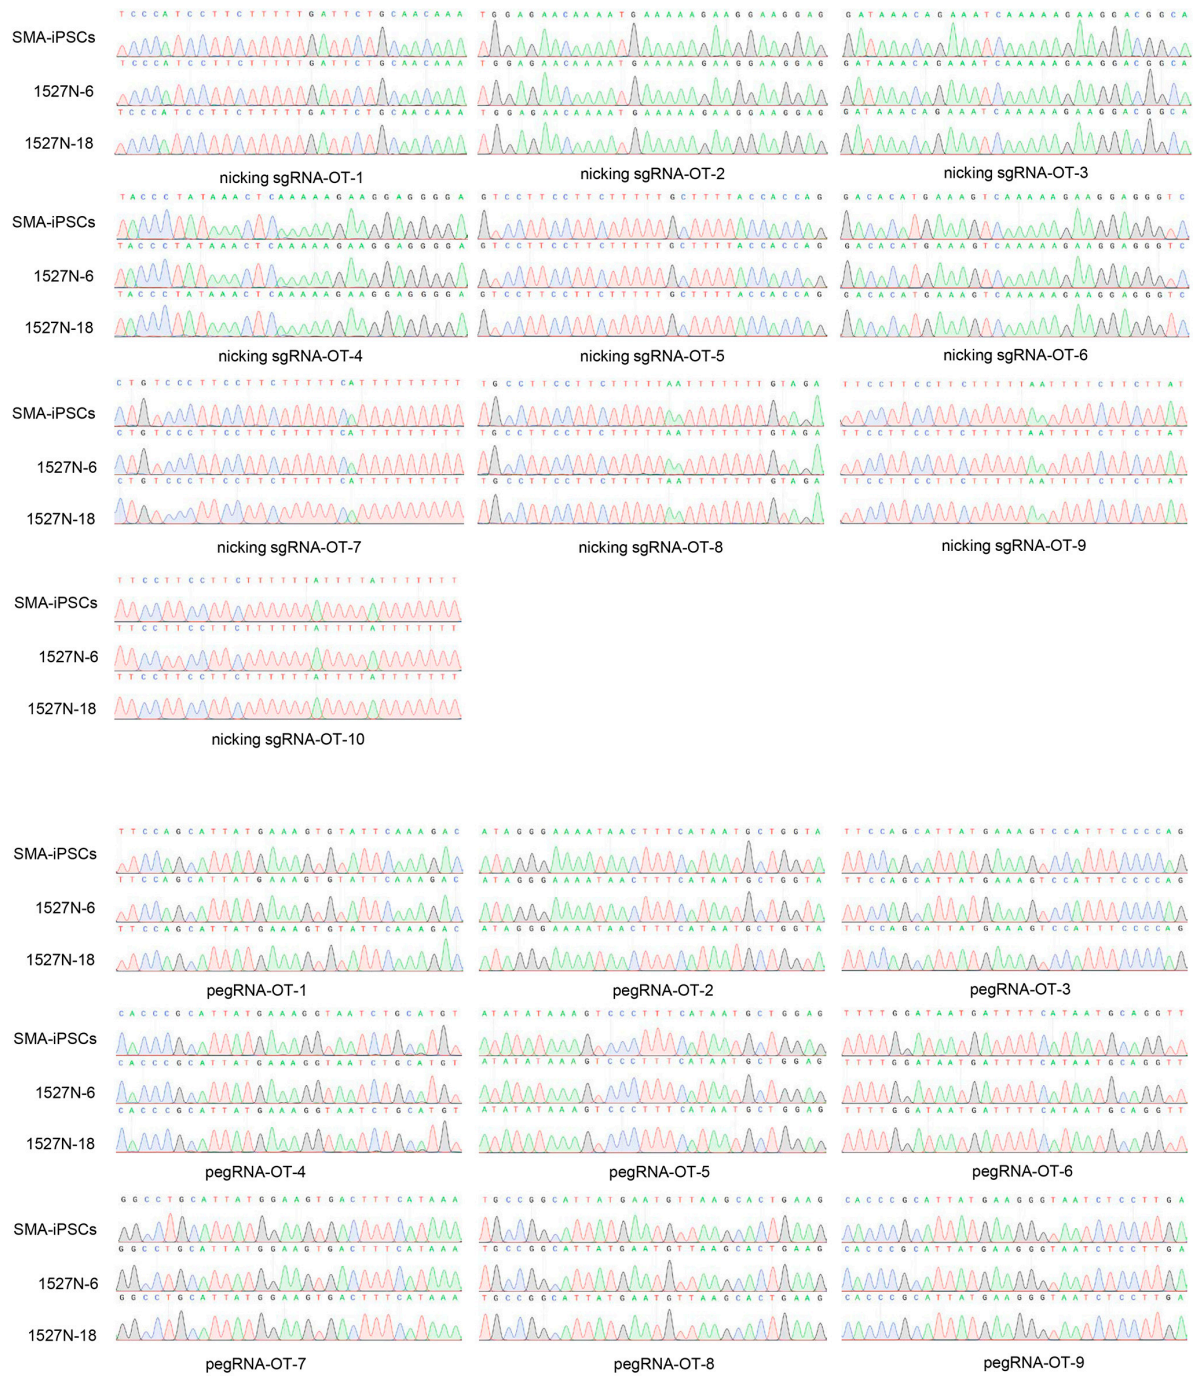

**Figure S3.** Sanger sequencing of the top ten potential off-target sites of nicking sgRNA and top nine sites for pegRNA after targeted-deletion. We analyzed the initial patient cells and the clone 1527N-6 and 1527N-8. No indels at the sites were found.

**Table S1. The oligos and primers used in this paper.**

|                                          |                    |                                                      |
|------------------------------------------|--------------------|------------------------------------------------------|
| nicking sgRNA target sequence            | Forward            | 5'-CACCGacaaaatcaaaaagaagga-3'                       |
|                                          | Reverse            | 5'-AAACtcttcttttgattttgtc-3'                         |
| Oligos used for pegRNAs construction     | 1319F              | 5'-5GTGCcttaaattaaggagtaagtttatgaaagtga-3'           |
|                                          | 1319R              | 5'-AAAAttcactttcataaacttactccttaatttaag-3'           |
|                                          | 1324F              | 5'-GTGCcattccttaaattaaggagtaagtttatgaaagtga-3'       |
|                                          | 1324R              | 5'-AAAAttcactttcataaacttactccttaatttaaggaatg-3'      |
|                                          | 1327F              | 5'-GTGCtcacattccttaaattaaggagtaagtttatgaaagtga-3'    |
|                                          | 1327R              | 5'-aaaattcactttcataaacttactccttaatttaaggaatgga-3'    |
|                                          | 1519F              | 5'-GTGCcttaaattaaggagtaagtttatgaaagtgaatc-3'         |
|                                          | 1519R              | 5'-AAAAGattcactttcataaacttactccttaatttaag-3'         |
|                                          | 1524F              | 5'-GTGCcattccttaaattaaggagtaagtttatgaaagtgaatc-3'    |
|                                          | 1524R              | 5'-AAAAGattcactttcataaacttactccttaatttaaggaatg-3'    |
|                                          | 1527F              | 5'-GTGCtcacattccttaaattaaggagtaagtttatgaaagtgaatc-3' |
|                                          | 1527R              | 5'-aaaagattcactttcataaacttactccttaatttaaggaatgga-3'  |
| PCR for identify targeted deletion clone | specific primer F1 | 5'-cattccttaaattaaggagtaagtttatg-3'                  |
|                                          | specific primer R1 | 5'-ccttcaactttctaactctgaact-3'                       |
| PCR for T-A cloned of mono-clones        | Forward            | 5'-tctcaagtgatccccctacct-3'                          |
|                                          | Reverse            | 5'-gtttcttcacacaaccaacc-3'                           |
| PCR for targeted deep sequencing         | Forward            | 5'-aaaatgtcttgtaaacaataatgc-3'                       |
|                                          | Reverse            | 5'-ccttcaactttctaactctgaact-3'                       |

|                                   |                           |                                 |
|-----------------------------------|---------------------------|---------------------------------|
| RT-PCR for exon 7 inclusion rates | Forward                   | 5'-GCTGATGCTTTGGGAAGTATGTTA-3'  |
|                                   | Reverse                   | 5'-GTCTGATCGTTTCTTTAGTGGTGTC-3' |
| qRT-PCR for total SMN mRNA        | Forward                   | 5'-GCTGATGCTTTGGGAAGTATGTTA-3'  |
|                                   | Reverse                   | 5'-GTCTGATCGTTTCTTTAGTGGTGTC-3' |
| qRT-PCR for Full-length SMN       | Forward based on exon 6   | 5'-GCTGATGCTTTGGGAAGTATGTTA-3'  |
|                                   | Reverse based on exon 7   | 5'-CACCTTCCTTCTTTTGATTTTGTC-3'  |
| qRT-PCR for $\Delta 7$ SMN        | Forward based on exon 5/6 | 5'-TGGACCACCAATAATTCCCC-3'      |
|                                   | Reverse based on exon 6/8 | 5'-ATGCCAGCATTTCCATATAATAGCC-3' |
| qRT-PCR for GAPDH                 | Forward                   | 5'-GACTTTGCTTTCCTTGGTCAGG-3'    |
|                                   | Reverse                   | 5'-AGTCTGGCTTATATCCAACACTTCG-3' |

**Table S2.** Potential off-target sites of pegRNA.

| sequence                                | mismatches                 | locus                     |
|-----------------------------------------|----------------------------|---------------------------|
| <b>TGA</b> AT <b>A</b> CACTTTCATAATGC   | 4MMs[1:2:3:6] with pegRNA  | chr12:129455147-129455169 |
| GA <b>AA</b> T <b>A</b> ACTTTCATAATGC   | 3MMs[3:5:7] with pegRNA    | chr7:142217490-142217512  |
| GA <b>A</b> T <b>GG</b> ACTTTCATAATGC   | 3MMs[3:6:7] with pegRNA    | chr7:126088251-126088273  |
| <b>C</b> AGATT <b>AC</b> CTTTCATAATGC   | 3MMs[1:7:8] with pegRNA    | chrX:35976377-35976399    |
| <b>TAA</b> AG <b>TCC</b> CTTTCATAATGC   | 4MMs[1:3:5:8] with pegRNA  | chr2:222190141-222190163  |
| GAT <b>A</b> AT <b>GAT</b> TTTTCATAATGC | 4MMs[3:5:7:9]with pegRNA   | chr5:17214384-17214406    |
| GA <b>A</b> AGTCAC <b>TTCC</b> ATAATGC  | 3MMs[3:5:12] with pegRNA   | chr15:78855498-78855520   |
| GT <b>G</b> CTT <b>AAC</b> ATTCATAATGC  | 4MMs[2:4:7:10] with pegRNA | chrX:107726513-107726535  |
| GAGATT <b>ACCC</b> TTTCATAATGC          | 3MMs[7:8:10] with pegRNA   | chr5:10647841-10647863    |

The off-target sites were predicted by the CCTop-CRISPR/Cas9 target online predictor. The mismatch is indicated by colored letters.

**Table S3.** Potential off-target sites of nicking sgRNA.

| sequence              | mismatches                       | locus                    |
|-----------------------|----------------------------------|--------------------------|
| TGCAGAAATCAAAAAGAAGGA | 3MMs[1:2:5] with nicking sgRNA   | chr4:173210765-173210787 |
| AACAAAATGAAAAAGAAGGA  | 2MMs[1:9] with nicking sgRNA     | chr1:207699639-207699661 |
| ACAGAAATCAAAAAGAAGGA  | 4MMs[1:2:3:4] with nicking sgRNA | chr20:48718502-48718524  |
| TATAAACTCAAAAAGAAGGA  | 3MMs[1:3:7] with nicking sgRNA   | chr4:15535358-15535380   |
| GGTAAAAGCAAAAAGAAGGA  | 3MMs[2:3:8] with nicking sgRNA   | chr2:170521750-170521772 |
| ATGAAAGTCAAAAAGAAGGA  | 4MMs[1:2:3:7]with nicking sgRNA  | chr2:18765858-18765880   |
| AAAAAAATGAAAAAGAAGGA  | 3MMs[1:3:9] with nicking sgRNA   | chr4:104654918-104654940 |
| AAAAAAATTAAAAAGAAGGA  | 3MMs[1:3:9] with nicking sgRNA   | chr7:129631378-129631400 |
| AAGAAAATTAAAAAGAAGGA  | 3MMs[1:3:9] with nicking sgRNA   | chr3:107870720-107870742 |
| AATAAAATAAAAAAGAAGGA  | 3MMs[1:3:9] with nicking sgRNA   | chr2:54380149-54380171   |

The off-target sites were predicted by the CCTop-CRISPR/Cas9 target online predictor. The mismatch is indicated by colored letters.

**Table S4.** Primers used in off-target analysis.

| Site                | Forward primer           | Reverse primer            | Expected product size, bp |
|---------------------|--------------------------|---------------------------|---------------------------|
| nicking sgRNA-OT-1  | ATCTAGTGAGGGTACAGGCAGG   | GTCACCTTTGCACTTTTGAC      | 899                       |
| nicking sgRNA-OT-2  | AACATGGGGACAGGGACTTC     | TCTTGGCTGAAACAGCTCGC      | 692                       |
| nicking sgRNA-OT-3  | CGGCTCACCGTGAAGTTCTA     | ATGGTCATGCTTGTTAAATGTTGGT | 767                       |
| nicking sgRNA-OT-4  | GATGCACAGTGGTACCCGAA     | GCAGGGACCCTATTGCCATT      | 612                       |
| nicking sgRNA-OT-5  | CCGCCCTTCTCTTCACCTTA     | GAGACTTGCGACTCGTGCTC      | 696                       |
| nicking sgRNA-OT-6  | CATCCGAGCCCTGATGAGAC     | ATCTGGCTCTACGTGTCCCT      | 897                       |
| nicking sgRNA-OT-7  | TCTATGAAGACCTCAAAAGATGCA | TCCTTACCTCCTTCTCCCCAC     | 403                       |
| nicking sgRNA-OT-8  | GCATTTCGAAGTTTGACCTCCTT  | AACACTGAATAGGCTTCTCCCTG   | 682                       |
| nicking sgRNA-OT-9  | GTAGGTTGCACCAATTTTATCCCT | ACCCACTGAGATACGATGATGC    | 604                       |
| nicking sgRNA-OT-10 | TGAGCCGAGATAGCACCATTG    | GGGGAGAGCGTATCAGCACA      | 733                       |
| pegRNA-OT-1         | AGCCATCCACAAGTGCCATTA    | CCCAGTGAAATGGTGCCCTC      | 800                       |
| pegRNA-OT-2         | AGTTCTCTCTTGACCCTCTTCCTC | TTGTTCCCACTAACCAACCTCTC   | 588                       |
| pegRNA-OT-3         | TTATCTCTACCTGGTTCCCCCT   | TTCACAAAGTTCAAAGCCTGG     | 587                       |
| pegRNA-OT-4         | GTA CTGTGTA CTGGTGCCAAGA | CACAAATACAGGGCACGTCAA     | 879                       |
| pegRNA-OT-5         | ATGAAGGTCTGCCTTTGGGG     | ATGGGCTTGGAAGGTAGCC       | 390                       |
| pegRNA-OT-6         | TCACACTCGGGTGACACTAC     | GGTTGCCAAAATGTTACCTCTCAA  | 841                       |
| pegRNA-OT-7         | GGGGGTGGGGAAGAAATAC      | GCTTCCACCTTTTGCCTATTG     | 869                       |
| pegRNA-OT-8         | CCTCACCCATTCCATTGCT      | CAGAGACCTGGGCACTTCTG      | 600                       |
| pegRNA-OT-9         | ATATTGGGGGCAGTGGGTG      | CCTTTAACCGATGGTGGGCT      | 676                       |



**Table S5.** Sources and applications of antibodies.

| Antibody                                                             | Source                       | Catalogue | Application               |
|----------------------------------------------------------------------|------------------------------|-----------|---------------------------|
| OCT4                                                                 | Abcam                        | ab181557  | 1:100 (IF)                |
| NANOG                                                                | Abcam                        | ab109250  | 1:100 (IF)                |
| SSEA-1                                                               | Merck Millipore              | SCR001    | 1:100 (IF)                |
| SSEA-4                                                               | Merck Millipore              | SCR001    | 1:100 (IF)                |
| TRA-1-60                                                             | Merck Millipore              | SCR001    | 1:100 (IF)                |
| TRA-1-81                                                             | Merck Millipore              | SCR001    | 1:100 (IF)                |
| OLIG2                                                                | Merck Millipore              | #AB9610   | 1:500 (IF)                |
| Islet-1                                                              | Merck Millipore              | #AB4326   | 1:100 (IF)                |
| SMI32                                                                | BioLegend                    | # 801701  | 1:100 (IF)                |
| HB9                                                                  | Sigma-Aldrich                | HPA071717 | 1:100 (IF)                |
| ChAT                                                                 | Merck Millipore              | #AB144P   | 1:100 (IF)                |
| SMN                                                                  | BD Transduction Laboratories | 610646    | 1:100 (IF), 1:10,000 (WB) |
| $\beta$ -actin                                                       | Sigma-Aldrich                | A5441     | 1:10,000 (WB)             |
| anti-mouse horseradish<br>peroxidase-conjugated secondary antibodies | Abcam                        | ab6789    | 1:10,000 (WB)             |

IF, immunofluorescence; WB, western blot.
